# Supplementary material for: The Genomic Landscape of Male Breast Cancers
Source: Oxford University Press journal article supplement (doi:10.1158/1078-0432.ccr-15-2840), 2016-03-09
Supplement: 10780432ccr152840-sup-158595_1_supp_3347822_h29706.pdf [file 10780432ccr152840-sup-158595_1_supp_3347822_h29706.pdf]

|         |   |    |       |    |     |       |        |    |     |       |        |    |    |       |        |    |     |       |        |
|---------|---|----|-------|----|-----|-------|--------|----|-----|-------|--------|----|----|-------|--------|----|-----|-------|--------|
| STAT3   | 0 | 17 | 0.0%  | 0  | 113 | 0.0%  | 1.0000 | 1  | 207 | 0.5%  | 1.0000 | 0  | 93 | 0.0%  | 1.0000 | 1  | 178 | 0.6%  | 1.0000 |
| SVEP1   | 2 | 15 | 11.8% | 0  | 113 | 0.0%  | 0.0162 | 4  | 204 | 1.9%  | 0.0674 | 0  | 93 | 0.0%  | 0.0227 | 3  | 176 | 1.7%  | 0.0607 |
| TBX3    | 0 | 17 | 0.0%  | 2  | 111 | 1.8%  | 1.0000 | 5  | 203 | 2.4%  | 1.0000 | 2  | 91 | 2.2%  | 1.0000 | 4  | 175 | 2.2%  | 1.0000 |
| TENM1   | 0 | 17 | 0.0%  | 0  | 113 | 0.0%  | 1.0000 | 3  | 205 | 1.4%  | 1.0000 | 0  | 93 | 0.0%  | 1.0000 | 3  | 176 | 1.7%  | 1.0000 |
| TGFBR1  | 1 | 16 | 5.9%  | 0  | 113 | 0.0%  | 0.1308 | 0  | 208 | 0.0%  | 0.0756 | 0  | 93 | 0.0%  | 0.1545 | 0  | 179 | 0.0%  | 0.0867 |
| TGFBR2  | 0 | 17 | 0.0%  | 1  | 112 | 0.9%  | 1.0000 | 1  | 207 | 0.5%  | 1.0000 | 1  | 92 | 1.1%  | 1.0000 | 1  | 178 | 0.6%  | 1.0000 |
| TGFBR3  | 0 | 17 | 0.0%  | 0  | 113 | 0.0%  | 1.0000 | 1  | 207 | 0.5%  | 1.0000 | 0  | 93 | 0.0%  | 1.0000 | 1  | 178 | 0.6%  | 1.0000 |
| TOP2A   | 0 | 17 | 0.0%  | 0  | 113 | 0.0%  | 1.0000 | 0  | 208 | 0.0%  | 1.0000 | 0  | 93 | 0.0%  | 1.0000 | 0  | 179 | 0.0%  | 1.0000 |
| TP53    | 1 | 16 | 5.9%  | 17 | 96  | 15.0% | 0.4647 | 24 | 184 | 11.5% | 0.7011 | 16 | 77 | 17.2% | 0.4635 | 23 | 156 | 12.8% | 0.6999 |
| TP53BP1 | 0 | 17 | 0.0%  | 0  | 113 | 0.0%  | 1.0000 | 0  | 208 | 0.0%  | 1.0000 | 0  | 93 | 0.0%  | 1.0000 | 0  | 179 | 0.0%  | 1.0000 |
| TSC1    | 0 | 17 | 0.0%  | 0  | 113 | 0.0%  | 1.0000 | 0  | 208 | 0.0%  | 1.0000 | 0  | 93 | 0.0%  | 1.0000 | 0  | 179 | 0.0%  | 1.0000 |
| TSC2    | 0 | 17 | 0.0%  | 1  | 112 | 0.9%  | 1.0000 | 1  | 207 | 0.5%  | 1.0000 | 0  | 93 | 0.0%  | 1.0000 | 0  | 179 | 0.0%  | 1.0000 |
| TYK2    | 0 | 17 | 0.0%  | 1  | 112 | 0.9%  | 1.0000 | 2  | 206 | 1.0%  | 1.0000 | 1  | 92 | 1.1%  | 1.0000 | 1  | 178 | 0.6%  | 1.0000 |
| UBR4    | 1 | 16 | 5.9%  | 2  | 111 | 1.8%  | 0.3456 | 3  | 205 | 1.4%  | 0.2713 | 2  | 91 | 2.2%  | 0.3987 | 3  | 176 | 1.7%  | 0.3064 |
| USP36   | 0 | 17 | 0.0%  | 0  | 113 | 0.0%  | 1.0000 | 2  | 206 | 1.0%  | 1.0000 | 0  | 93 | 0.0%  | 1.0000 | 2  | 177 | 1.1%  | 1.0000 |
| WDFY3   | 1 | 16 | 5.9%  | 3  | 110 | 2.7%  | 0.4332 | 4  | 204 | 1.9%  | 0.3273 | 2  | 91 | 2.2%  | 0.3987 | 3  | 176 | 1.7%  | 0.3064 |
| XBP1    | 0 | 17 | 0.0%  | 1  | 112 | 0.9%  | 1.0000 | 1  | 207 | 0.5%  | 1.0000 | 0  | 93 | 0.0%  | 1.0000 | 0  | 179 | 0.0%  | 1.0000 |
| XPA     | 0 | 17 | 0.0%  | 0  | 113 | 0.0%  | 1.0000 | 0  | 208 | 0.0%  | 1.0000 | 0  | 93 | 0.0%  | 1.0000 | 0  | 179 | 0.0%  | 1.0000 |
| XPC     | 0 | 17 | 0.0%  | 0  | 113 | 0.0%  | 1.0000 | 0  | 208 | 0.0%  | 1.0000 | 0  | 93 | 0.0%  | 1.0000 | 0  | 179 | 0.0%  | 1.0000 |
| XRCC1   | 0 | 17 | 0.0%  | 0  | 113 | 0.0%  | 1.0000 | 0  | 208 | 0.0%  | 1.0000 | 0  | 93 | 0.0%  | 1.0000 | 0  | 179 | 0.0%  | 1.0000 |
| XRCC2   | 0 | 17 | 0.0%  | 0  | 113 | 0.0%  | 1.0000 | 0  | 208 | 0.0%  | 1.0000 | 0  | 93 | 0.0%  | 1.0000 | 0  | 179 | 0.0%  | 1.0000 |
| XRCC3   | 0 | 17 | 0.0%  | 0  | 113 | 0.0%  | 1.0000 | 0  | 208 | 0.0%  | 1.0000 | 0  | 93 | 0.0%  | 1.0000 | 0  | 179 | 0.0%  | 1.0000 |
| ZFHX3   | 0 | 17 | 0.0%  | 1  | 112 | 0.9%  | 1.0000 | 5  | 203 | 2.4%  | 1.0000 | 1  | 92 | 1.1%  | 1.0000 | 4  | 175 | 2.2%  | 1.0000 |
| ZFHX4   | 2 | 15 | 11.8% | 3  | 110 | 2.7%  | 0.1272 | 5  | 203 | 2.4%  | 0.0902 | 3  | 90 | 3.2%  | 0.1698 | 5  | 174 | 2.8%  | 0.1149 |
| ZNF384  | 0 | 17 | 0.0%  | 0  | 113 | 0.0%  | 1.0000 | 0  | 208 | 0.0%  | 1.0000 | 0  | 93 | 0.0%  | 1.0000 | 0  | 179 | 0.0%  | 1.0000 |
| ZNF703  | 0 | 17 | 0.0%  | 0  | 113 | 0.0%  | 1.0000 | 0  | 208 | 0.0%  | 1.0000 | 0  | 93 | 0.0%  | 1.0000 | 0  | 179 | 0.0%  | 1.0000 |





Supplementary Table S12  
Page 3

|        |   |    |      |   |    |      |        |   |     |      |        |   |    |      |        |   |     |      |        |
|--------|---|----|------|---|----|------|--------|---|-----|------|--------|---|----|------|--------|---|-----|------|--------|
| WDFY3  | 0 | 42 | 0.0% | 1 | 50 | 2.0% | 1.0000 | 1 | 106 | 0.9% | 1.0000 | 1 | 47 | 2.1% | 1.0000 | 1 | 100 | 1.0% | 1.0000 |
| XBP1   | 0 | 42 | 0.0% | 0 | 51 | 0.0% | 1.0000 | 0 | 107 | 0.0% | 1.0000 | 0 | 48 | 0.0% | 1.0000 | 0 | 101 | 0.0% | 1.0000 |
| XPA    | 0 | 42 | 0.0% | 0 | 51 | 0.0% | 1.0000 | 0 | 107 | 0.0% | 1.0000 | 0 | 48 | 0.0% | 1.0000 | 0 | 101 | 0.0% | 1.0000 |
| XPC    | 1 | 41 | 2.4% | 0 | 51 | 0.0% | 0.4516 | 0 | 107 | 0.0% | 0.2819 | 0 | 48 | 0.0% | 0.4667 | 0 | 101 | 0.0% | 0.2937 |
| XRCC1  | 0 | 42 | 0.0% | 1 | 50 | 2.0% | 1.0000 | 1 | 106 | 0.9% | 1.0000 | 1 | 47 | 2.1% | 1.0000 | 1 | 100 | 1.0% | 1.0000 |
| XRCC2  | 0 | 42 | 0.0% | 0 | 51 | 0.0% | 1.0000 | 0 | 107 | 0.0% | 1.0000 | 0 | 48 | 0.0% | 1.0000 | 0 | 101 | 0.0% | 1.0000 |
| XRCC3  | 0 | 42 | 0.0% | 0 | 51 | 0.0% | 1.0000 | 0 | 107 | 0.0% | 1.0000 | 0 | 48 | 0.0% | 1.0000 | 0 | 101 | 0.0% | 1.0000 |
| ZFXH3  | 3 | 39 | 7.1% | 0 | 51 | 0.0% | 0.0885 | 0 | 107 | 0.0% | 0.0212 | 0 | 48 | 0.0% | 0.0977 | 0 | 101 | 0.0% | 0.0244 |
| ZFXH4  | 3 | 39 | 7.1% | 2 | 49 | 3.9% | 0.6550 | 2 | 105 | 1.9% | 0.1363 | 2 | 46 | 4.2% | 0.6612 | 2 | 99  | 2.0% | 0.1510 |
| ZNF384 | 0 | 42 | 0.0% | 0 | 51 | 0.0% | 1.0000 | 0 | 107 | 0.0% | 1.0000 | 0 | 48 | 0.0% | 1.0000 | 0 | 101 | 0.0% | 1.0000 |
| ZNF703 | 0 | 42 | 0.0% | 0 | 51 | 0.0% | 1.0000 | 0 | 107 | 0.0% | 1.0000 | 0 | 48 | 0.0% | 1.0000 | 0 | 101 | 0.0% | 1.0000 |
